# Supplementary material
Source: HighWire-hosted journal article supplement (https://openheart.bmj.com/content/12/1/e003047)
Supplement: inline-supplementary-material-1 [file inline-supplementary-material-1.pdf]

## **Supplement: Validation of the 0/3-h algorithm and the APACE criteria to triage patients in the observe-zone**

Supplementary Tables

Table S1: Information on acute coronary syndrome classification algorithms respecting sampling time intervals.

| Elapsed Sampling Time                                                 | hs-TroponinT Levels & Changes                                                                                                                                        | Classification & Interpretation                               |
|-----------------------------------------------------------------------|----------------------------------------------------------------------------------------------------------------------------------------------------------------------|---------------------------------------------------------------|
| <b>Immediate classification (ESC 0h strategy)</b>                     |                                                                                                                                                                      |                                                               |
| Any time if symptoms started >3 hours ago                             | hs-TroponinT (first test) <5 ng/L                                                                                                                                    | <b>Rule-out (ESC 0h) –</b>                                    |
| Any time                                                              | hs-TroponinT (first test) ≥52 ng/L                                                                                                                                   | <b>Rule-in (ESC 0h)</b>                                       |
| <b>Less than 30 minutes between tests</b>                             | N/A                                                                                                                                                                  | <b>Insufficient time interval for reliable classification</b> |
| <b>30 to 90 minutes between tests (0/1h strategy)</b>                 |                                                                                                                                                                      |                                                               |
|                                                                       | hs-TroponinT (first test) <12 ng/L AND absolute change <3 ng/L                                                                                                       | <b>Rule-out (ESC 0/1h)</b>                                    |
|                                                                       | hs-TroponinT (first test) ≥12 ng/L OR absolute change ≥3 ng/L but <5 ng/L                                                                                            | <b>Observation zone (ESC 0/1h)</b>                            |
|                                                                       | Absolute change ≥5 ng/L                                                                                                                                              | <b>Rule-in (ESC 0/1h)</b>                                     |
| <b>90 to 150 minutes between tests (0/2h strategy, Reichlin 2015)</b> |                                                                                                                                                                      |                                                               |
|                                                                       | hs-TroponinT (first test) <14 ng/L AND hs-TroponinT (second test) <14 ng/L AND absolute change <4 ng/L                                                               | <b>Rule-out (0/2h)</b>                                        |
|                                                                       | Any of the following: hs-TroponinT (first or second test) ≥14 ng/L, or absolute change ≥4 ng/L, but hs-TroponinT values remain <53 ng/L and absolute change <10 ng/L | <b>Observation zone (0/2h)</b>                                |
|                                                                       | hs-TroponinT (first and second test) ≥53 ng/L                                                                                                                        | <b>Rule-in (0/2h)</b>                                         |
|                                                                       | Absolute change ≥10 ng/L                                                                                                                                             | <b>Rule-in (0/2h)</b>                                         |
| <b>More than 150 minutes between tests (0/3h strategy)</b>            |                                                                                                                                                                      |                                                               |
|                                                                       | hs-TroponinT (first test) ≤14 ng/L AND (hs-TroponinT (second test) ≤14 ng/L OR absolute change ≤7 ng/L)                                                              | <b>Rule-out (ESC 0/3h)</b>                                    |
|                                                                       | hs-TroponinT (first test) >14 ng/L AND (hs-TroponinT (second test) ≤14 ng/L OR relative change (absolute change / first test value) ≤0.2)                            | <b>Rule-out (ESC 0/3h)</b>                                    |
|                                                                       | hs-TroponinT (first test) ≤14 ng/L AND hs-TroponinT (second test) >14 ng/L AND absolute change >7 ng/L                                                               | <b>Rule-in (ESC 0/3h)</b>                                     |
|                                                                       | hs-TroponinT (first test) >14 ng/L AND hs-TroponinT (second test) >14 ng/L AND relative change >0.2                                                                  | <b>Rule-in (ESC 0/3h)</b>                                     |
