# Supplementary material
Source: HighWire-hosted journal article supplement (https://openheart.bmj.com/content/12/1/e003047)
Supplement: inline-supplementary-material-3 [file inline-supplementary-material-3.pdf]

## Observe-Zone Resolution with Strict 3-Hour Sampling

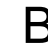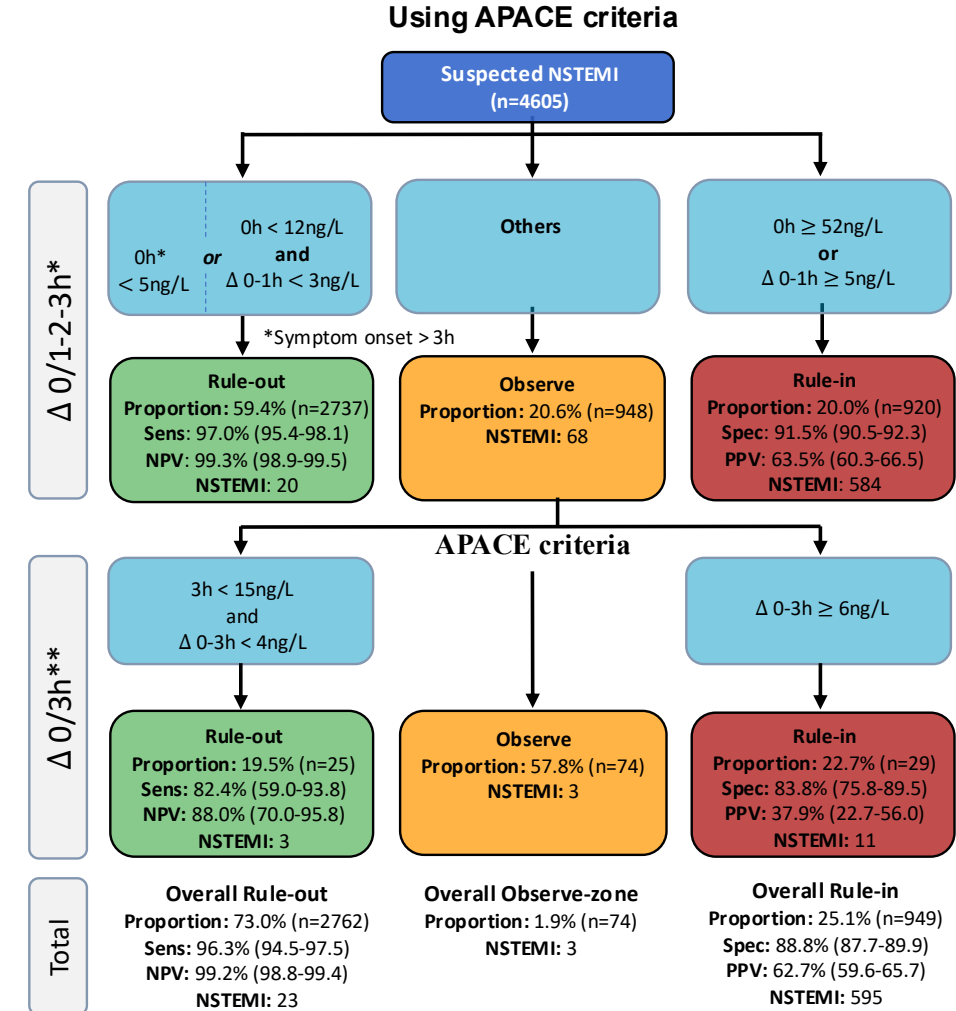

\*\* Missing measurement or 3rd troponin > 210 minutes: Proportion in Observe Zone 86.5% (n=820), NSTEMI: 51
